# Supplementary material for: Pilot Study of the MAP Curriculum for Psychotherapy Competencies in Child and Adolescent Psychiatry
Source: Atypon-hosted journal article supplement (doi:10.1176/appi.psychotherapy.20210010), 2021-11-02
Supplement: appi.psychotherapy.20210010.ds001.pdf [file appi.psychotherapy.20210010.ds001.pdf]

Table

ACGME Subcompetencies and Contributions of MAP Components as Rated by Experts

|                   |                    | Concepts         |              |         |                               |                              |                 | Resources           |                    |                 |                |                        |                     | Applications       |            |            |          | Sys               |            |
|-------------------|--------------------|------------------|--------------|---------|-------------------------------|------------------------------|-----------------|---------------------|--------------------|-----------------|----------------|------------------------|---------------------|--------------------|------------|------------|----------|-------------------|------------|
|                   |                    | EBS System Model | CARE Process | The Map | Connect-Cultivate-Consolidate | Focus Interference Framework | Session Planner | Embracing Diversity | Clinical Dashboard | Practice Guides | PWEBS Database | Supervision Curriculum | Therapist Portfolio | Treatment Pathways | Assessment | Monitoring | Planning | Practice Delivery | MAP System |
| Patient Care      | Evaluate           | ○                | ●            | ○       |                               |                              |                 | ○                   |                    |                 |                | ○                      |                     |                    | ○          |            |          | ●                 |            |
|                   | Formulate/Diagnose | ●                |              |         |                               | ○                            |                 |                     | ●                  |                 |                | ●                      |                     |                    |            |            |          |                   |            |
|                   | Tx Plan/Manage     | ●                | ●            | ●       | ○                             | ●                            |                 | ●                   | ●                  | ●               | ●              |                        |                     | ●                  |            | ●          | ●        | ●                 |            |
|                   | Psychotherapy      | ○                | ○            |         | ●                             | ●                            | ●               | ○                   | ○                  | ○               |                | ●                      |                     |                    |            |            |          |                   | ●          |
|                   | Somatic Therapy    | ○                | ○            | ○       |                               |                              |                 |                     | ○                  |                 |                |                        |                     |                    |            | ○          |          | ●                 |            |
| Medical Knowledge | Development        |                  |              |         |                               |                              |                 |                     |                    |                 |                |                        |                     |                    |            |            |          | ○                 |            |
|                   | Pathology/Wellness | ○                |              | ○       | ○                             |                              |                 |                     |                    |                 | ○              |                        |                     |                    | ○          |            | ○        | ○                 |            |
|                   | Neuro/Genetics     |                  |              |         |                               |                              |                 |                     |                    |                 |                |                        |                     |                    |            |            |          |                   |            |
|                   | Psychotherapy      | ●                |              | ●       | ●                             | ●                            | ●               | ●                   | ○                  | ●               | ●              | ●                      |                     | ○                  |            |            |          |                   | ●          |
|                   | Somatic Therapy    | ○                |              |         |                               |                              |                 |                     |                    |                 |                | ○                      |                     |                    |            |            |          |                   |            |
|                   | Practice of Psych  | ○                |              |         |                               |                              |                 |                     |                    |                 |                | ○                      |                     |                    |            |            |          |                   |            |
| SBP               | Safety & Team      | ○                | ○            | ○       |                               |                              |                 | ○                   | ○                  |                 |                |                        |                     |                    |            |            |          |                   | ●          |
|                   | Resource Manage    | ●                | ●            | ●       |                               |                              |                 |                     | ●                  | ●               | ●              | ○                      |                     |                    |            | ○          |          |                   | ●          |
|                   | Community Care     | ○                |              |         |                               |                              |                 |                     |                    |                 |                |                        |                     |                    |            |            | ○        |                   | ●          |
|                   | Non-Med Consult    |                  | ○            |         |                               |                              |                 |                     |                    |                 |                | ●                      |                     |                    |            |            |          |                   | ●          |
| PBLI              | Lifelong Learning  | ●                | ○            | ○       |                               |                              |                 |                     | ●                  | ○               | ●              | ●                      | ●                   |                    |            | ○          |          |                   |            |
|                   | Teaching           |                  |              |         |                               |                              |                 |                     |                    |                 |                | ●                      | ●                   |                    |            |            |          |                   |            |
| Prof.             | Integrity/Ethics   | ○                |              |         |                               |                              |                 | ●                   |                    |                 |                |                        |                     |                    |            |            | ○        |                   | ●          |
|                   | Accountability     | ○                |              |         |                               |                              |                 |                     |                    |                 |                |                        |                     |                    |            |            |          |                   |            |
| ICS               | Relation/Conflict  | ○                |              |         |                               |                              |                 | ●                   |                    |                 |                | ●                      |                     |                    |            |            |          |                   | ●          |
|                   | Info Share/Record  | ○                |              |         |                               |                              |                 | ○                   | ○                  |                 |                | ●                      |                     |                    |            |            |          |                   | ●          |

Note. ● MAP component has potential to make direct, significant contribution to development of subcompetency.  
 ● MAP component has potential to make partial contribution to development of subcompetency, but would need to be supplemented with other MAP components. ○ MAP component has potential to make partial contribution to development of subcompetency, but would need to be supplemented with other components beyond MAP;  
 SBP: Systems-Based Practice; PBLI: Practice Based Learning and Improvement; Prof: Professionalism;  
 ICS: Interpersonal/Communication Skills
